# Supplementary material
Source: PubMed Central journal article supplement (PMC8194803)
Supplement: daab050_supplementary_data.pdf [file daab050_supplementary_data.pdf]

# Supplementary Appendix

Supplement to: Mira Johri, Sumeet Agarwal, Aman Khullar, Dinesh Chandra, Vijay Sai Pratap, Aaditeshwar Seth, and the Gram Vaani Team. **The first 100 days: How has COVID-19 affected poor and vulnerable groups in India?**

## Table of contents

|                                                                                                                                                                  |    |
|------------------------------------------------------------------------------------------------------------------------------------------------------------------|----|
| Supplementary Figure 1. Framework to monitor the effects of the COVID-19 pandemic and response measures .....                                                    | 2  |
| Supplementary table 1. Coding template for data extraction.....                                                                                                  | 3  |
| Supplementary table 2. Construction of the SDG variables .....                                                                                                   | 12 |
| Supplementary figure 2. Temporal distribution of total calls and callers over the 100-day analysis period. ....                                                  | 16 |
| Supplementary figure 3. Temporal distribution of total contributions and SOS messages over the 100-day analysis period.....                                      | 16 |
| Supplementary figure 4. Temporal evolution of issues raised by rural callers <sup>1</sup> to the COVID-19 IVR platform March 13-June 20, 2020 <sup>2</sup> ..... | 17 |
| Supplementary figure 5. Temporal evolution of issues raised by urban callers <sup>1</sup> to the COVID-19 IVR platform March 13-June 20, 2020 <sup>2</sup> ..... | 18 |
| Supplementary figure 6. Issues raised by female callers <sup>1</sup> categorised according to the UN 2030 Sustainable Development Goals .....                    | 19 |
| Supplementary figure 7. Issues raised by male callers <sup>1</sup> categorised according to the UN 2030 Sustainable Development Goals .....                      | 20 |

Supplementary Figure 1. Framework to monitor the effects of the COVID-19 pandemic and response measures

# Supplementary Figure 1. Framework to monitor the effects of the COVID-19 pandemic and response measures

## SDG1: No poverty

End poverty in all its forms everywhere. **Linked to** Social security & Income

## SDG2: Zero hunger

End hunger, achieve food security and improved nutrition and promote sustainable agriculture. **Linked to** safe food, adequate nutrition

## SDG3: Good health & well-being

Ensure healthy lives and promote well-being for all at all ages. **Linked to** the entitlement to equal and timely access to basic health services and protection against the financial effects of ill health.

## SDG4: Quality education

Ensure inclusive and equitable quality education and promote lifelong learning opportunities for all. **Linked to** health-related education and information.

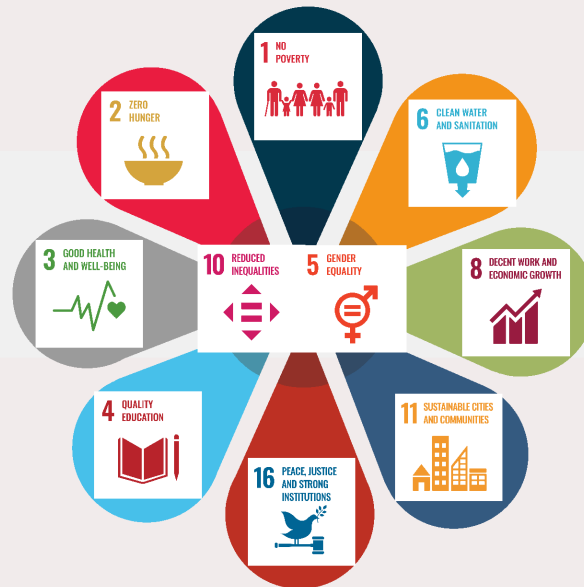

## SDG6: Clean water & sanitation

Ensure availability and sustainable management of water and sanitation for all. **Linked to** safe drinking water & adequate sanitation.

## SDG8: Decent work & economic growth

Promote sustained, inclusive and sustainable economic growth, full and productive employment and decent work for all. **Linked to** healthy working conditions.

## SDG11: Sustainable cities & communities

Make cities and human settlements inclusive, safe, resilient and sustainable. **Linked to** decent housing, community participation in health.

## SDG16: Peace, justice & strong institutions

Promote peaceful and inclusive societies for sustainable development, provide access to justice for all and build effective, accountable and inclusive institutions at all levels. **Linked to** policy tailored for vulnerable populations.

Each SDG is linked to entitlements and determinants enshrined in the Human Right to Health framework, with reduced inequalities as cross-cutting themes.

Supplementary table 1. Coding template for data extraction

| Section                               | Questions/issues                                              | variable                                       |                                                                                | Categories        |  |
|---------------------------------------|---------------------------------------------------------------|------------------------------------------------|--------------------------------------------------------------------------------|-------------------|--|
| Section: A                            | 1.Call code                                                   | a1_call_code                                   |                                                                                |                   |  |
|                                       | 2. Is the call relevant?                                      | a2_rel_audio                                   | Yes - 1<br>No - 0                                                              |                   |  |
|                                       | 3. State                                                      | a3_state                                       |                                                                                |                   |  |
|                                       | 4.District                                                    | a4_dist                                        |                                                                                |                   |  |
|                                       | 5. Block                                                      | a5_block                                       |                                                                                |                   |  |
|                                       | 6. Village                                                    | a6_vill                                        |                                                                                |                   |  |
|                                       | 7. Caller location                                            | a7_call_loc                                    |                                                                                |                   |  |
|                                       | 8.Caller sex                                                  | a8_caller_sex                                  | Male - 0<br>Female - 1<br>Other-2                                              |                   |  |
|                                       | 9. Was the audio self-recorded or was interviewed by someone? | a9_rec_inter                                   | Self-recorded -0<br>MV reporter own recording -1<br>Interviewe of someone-2    |                   |  |
|                                       | 10. If interview then who was the interviewer?                | a10_inter_by                                   | MV reporter - 0<br>Other - 1                                                   |                   |  |
|                                       | 11. The caller was from which area?                           | a11_caller_area                                | Rural -0<br>Urban - 1<br>Could not identify - 2                                |                   |  |
|                                       | 12. Domicile                                                  | a12_domicile                                   | Migrant - 0<br>Local resident - 1<br>MV reporter - 2<br>Could not identify - 3 |                   |  |
|                                       | 13.Move ment of of caller                                     | 13a.Stranded or on the way                     | a13a_stranded                                                                  | Yes - 1<br>No - 0 |  |
|                                       |                                                               | 13.b Reached Home                              | a13b_reached                                                                   | Yes - 1<br>No - 0 |  |
|                                       |                                                               | 13c. Local resident                            | a13c_local                                                                     | Yes - 1<br>No - 0 |  |
|                                       | 14. Income source                                             | 14a.Service sector, eg. health worker, teacher | a14a_service                                                                   | Yes - 1<br>No - 0 |  |
| 14b.Construction or other labour work |                                                               | a14b_construction                              | Yes - 1<br>No - 0                                                              |                   |  |
| 14c. Farmer with land                 |                                                               | a14c_farmer_ownland                            | Yes - 1<br>No - 0                                                              |                   |  |
| 14d.Farmer without land               |                                                               | a14d_farmer_landless                           | Yes - 1<br>No - 0                                                              |                   |  |
| 14e. Industrial worker                |                                                               | a14e_industrial                                | Yes - 1<br>No - 0                                                              |                   |  |
| 14f. Street vendor                    |                                                               | a14f_vendor                                    | Yes - 1<br>No - 0                                                              |                   |  |

|            |                                                                                                              |                                                               |                                                                                                                                                                                       |                   |                                    |
|------------|--------------------------------------------------------------------------------------------------------------|---------------------------------------------------------------|---------------------------------------------------------------------------------------------------------------------------------------------------------------------------------------|-------------------|------------------------------------|
|            | 14g. Self employed, eg. Shopkeeper                                                                           | a14g_self_employ                                              | Yes - 1<br>No - 0                                                                                                                                                                     |                   |                                    |
|            | 14h. MV Reporter                                                                                             | a14h_mv_reporter                                              | Yes - 1<br>No - 0                                                                                                                                                                     |                   |                                    |
|            | 14i. Private job                                                                                             | a14i_pvt_job                                                  | Yes - 1<br>No - 0                                                                                                                                                                     |                   |                                    |
|            | 14j. Student                                                                                                 | a14j_student                                                  | Yes - 1<br>No - 0                                                                                                                                                                     |                   |                                    |
|            | 14k. Could not identify                                                                                      | a14k_dont_know                                                | Yes - 1<br>No - 0                                                                                                                                                                     |                   |                                    |
|            | 15. Employment type                                                                                          | a15_employ_type                                               | Daily wager - 0<br>Employed via contractor - 1<br>Self employment (Shopkeeper/ street vendor) - 2<br>Permanent worker - 3<br>MV reporter - 4<br>Student - 5<br>Could not identify - 6 |                   |                                    |
|            | 16. COVID19 relationship                                                                                     | a16_covid_rel                                                 | COVID19 patient and family - 0<br>Nothing to do with COVID19 patient and family - 1                                                                                                   |                   |                                    |
|            | 17. Is the problem in the content related to individual/household or group of people (different households)? | a17_content_rela                                              | Individual / HH- 0<br>Group of people (different family) - 1                                                                                                                          |                   |                                    |
| Section: B | 18. What type of problem they were facing/talking about?                                                     | 1. Ration/Food                                                | b1_ration                                                                                                                                                                             | Yes - 1<br>No - 0 | Zero hunger                        |
|            |                                                                                                              | 2. Financial                                                  | b2_finance                                                                                                                                                                            | Yes - 1<br>No - 0 | No poverty                         |
|            |                                                                                                              | 3. Water                                                      | b3_water                                                                                                                                                                              | Yes - 1<br>No - 0 | Clean water and sanitation         |
|            |                                                                                                              | 4. Electricity                                                | b4_electricity                                                                                                                                                                        | Yes - 1<br>No - 0 | Sustainable cities and communities |
|            |                                                                                                              | 5. Transportation                                             | b5_transport                                                                                                                                                                          | Yes - 1<br>No - 0 | Sustainable cities and communities |
|            |                                                                                                              | 6. Gas cylinder                                               | b6_gas                                                                                                                                                                                | Yes - 1<br>No - 0 | No poverty                         |
|            |                                                                                                              | 7. Health                                                     | b7_health                                                                                                                                                                             | Yes - 1<br>No - 0 | Good health and well-being         |
|            |                                                                                                              | 8. Quarantine                                                 | b8_quarantine                                                                                                                                                                         | Yes - 1<br>No - 0 | Good health and well-being         |
|            |                                                                                                              | 9. Employment/work in NREGA                                   | b9_nrega                                                                                                                                                                              | Yes - 1<br>No - 0 | Decent work and economic growth    |
|            |                                                                                                              | 10. Employment/ work in cities or villages, not NREGA related | b10_non_nrega                                                                                                                                                                         | Yes - 1<br>No - 0 | Decent work and economic growth    |

|             |                             |                                                                                         |                        |                   |                                        |
|-------------|-----------------------------|-----------------------------------------------------------------------------------------|------------------------|-------------------|----------------------------------------|
|             |                             | 11. Education (School)                                                                  | b11_school             | Yes - 1<br>No - 0 | Quality education                      |
|             |                             | 12. Higher Education                                                                    | b12_edu_higher         | Yes - 1<br>No - 0 | Peace, Justice and strong institutions |
|             |                             | 13. COVID19 rule/guideline                                                              | b13_covid_rule         | Yes - 1<br>No - 0 | Good health and well-being             |
|             |                             | 14. Discrimination                                                                      | b14_discrimination     | Yes - 1<br>No - 0 | Reduce inequalities                    |
|             |                             | 15. Violence                                                                            | b15_violence           | Yes - 1<br>No - 0 | Peace, Justice and strong institutions |
|             |                             | 16. Farming related                                                                     | b16_farming            | Yes - 1<br>No - 0 | No poverty                             |
|             |                             | 17. Livelihood (Street vendor, shopkeepers, traders)                                    | b17_livelihood         | Yes - 1<br>No - 0 | No poverty                             |
|             |                             | 18. Shopkeeper charging more/ increased prices                                          | b18_increased_price    | Yes - 1<br>No - 0 | Peace, Justice and strong institutions |
|             |                             | 19. Sanitation                                                                          | b19_sanitation         | Yes - 1<br>No - 0 | Clean water and sanitation             |
|             |                             | 20. Agriculture or livestock impacted                                                   | b20_agri_livestock     | Yes - 1<br>No - 0 | No poverty                             |
|             |                             | 21. Lack of awareness or misinformation                                                 | b21_awareness          | Yes - 1<br>No - 0 | Good health and well-being             |
|             |                             | 22. Sexual harassment                                                                   | b22_sexual_harassments | Yes - 1<br>No - 0 | Gender equality                        |
|             |                             | 23. Landlord not give permission to leave without paying rent                           | b23_house_rent         | Yes - 1<br>No - 0 | Sustainable cities and communities     |
|             |                             | 24. Other                                                                               | b24_other_prob         | Yes - 1<br>No - 0 |                                        |
|             |                             | 25. Specify                                                                             | b25_other_spe          |                   |                                        |
|             | Panchayat issue             | 26. Is panchayat mentioned as the being responsible for the problem?                    | b26_panchayat_response | Yes - 1<br>No - 0 | Peace, Justice and strong institutions |
| Section: B1 | b1. If ration /food related | a. No ration card                                                                       | b1a_no_ration          | Yes - 1<br>No - 0 | Zero hunger                            |
|             |                             | b. Ration dealer not distributing ration                                                | b1b_ration_distr       | Yes - 1<br>No - 0 | Zero hunger                            |
|             |                             | c. Ration dealer asking//taking more money for ration or taking bribe                   | b1c_bribe              | Yes - 1<br>No - 0 | Peace, Justice and strong institutions |
|             |                             | d. Ration dealer not opening the PDS shop                                               | b1d_shop_close         | Yes - 1<br>No - 0 | Zero hunger                            |
|             |                             | e. Ration dealer giving not enough ration as per rule, only giving aata/rice and no dal | b1e_insuffi_ration     | Yes - 1<br>No - 0 | Zero hunger                            |
|             |                             | f. Out of food                                                                          | b1f_out_food           | Yes - 1<br>No - 0 | Zero hunger                            |
|             |                             | g. Not following any other COVID19 rule/guideline at ration shop                        | b1g_covid_rule         | Yes - 1<br>No - 0 | Peace, Justice and strong institutions |
|             |                             | h. Overcrowding at the ration shop                                                      | b1h_crowded            | Yes - 1<br>No - 0 | Peace, Justice and strong institutions |
|             |                             | i. Retail prices of other things are very high2                                         | b1i_increased_prices   | Yes - 1<br>No - 0 | Zero hunger                            |

|             |                                                   |                                                                                                                                |                      |                   |                                        |
|-------------|---------------------------------------------------|--------------------------------------------------------------------------------------------------------------------------------|----------------------|-------------------|----------------------------------------|
|             |                                                   | j. Cooked food related issues - community kitchens, didi kitchens                                                              | b1j_cooked_food      | Yes - 1<br>No - 0 | Zero hunger                            |
|             |                                                   | k.Steps taken, eg. survey of village for new ration cards                                                                      | b1k_taken_step       | Yes - 1<br>No - 0 | Peace, Justice and strong institutions |
|             |                                                   | l. Other                                                                                                                       | b1l_other            | Yes - 1<br>No - 0 |                                        |
|             |                                                   | m. Specify                                                                                                                     | b1m_other_spe        |                   |                                        |
| Section: B2 | b2. If financial                                  | a. Out fo cash                                                                                                                 | b2a_out_cash         | Yes - 1<br>No - 0 | No poverty                             |
|             |                                                   | b. Bank/ATM not working                                                                                                        | b2b_not_working      | Yes - 1<br>No - 0 | Peace, Justice and strong institutions |
|             |                                                   | c. Not getting pension                                                                                                         | b2c_no_pension       | Yes - 1<br>No - 0 | Peace, Justice and strong institutions |
|             |                                                   | d. Not getting relief fund (Rs 1000 for ration card holders, Rs 1000-5000 for workers)                                         | b2d_no_relief        | Yes - 1<br>No - 0 | Peace, Justice and strong institutions |
|             |                                                   | e. No fund received in Jandhan account                                                                                         | b2e_no_jandhan_fund  | Yes - 1<br>No - 0 | Peace, Justice and strong institutions |
|             |                                                   | f. Not getting benefit of Government scheme (eg. NREGA, PM-KISAN)                                                              | b2f_no_benefit       | Yes - 1<br>No - 0 | Peace, Justice and strong institutions |
|             |                                                   | g. Bank staff asking for bribe, eg. account reactivation, Aadhaar linkage, cases of fraud                                      | b2g_bribe            | Yes - 1<br>No - 0 | Peace, Justice and strong institutions |
|             |                                                   | h. Not following any other COVID19 rule/guideline at Bank/ATM                                                                  | b2h_covid_rule       | Yes - 1<br>No - 0 | Peace, Justice and strong institutions |
|             |                                                   | i. Bank/ATM are over crowded                                                                                                   | b2i_crowded          | Yes - 1<br>No - 0 | Peace, Justice and strong institutions |
|             |                                                   | j. Other                                                                                                                       | b2j_other            | Yes - 1<br>No - 0 |                                        |
|             |                                                   | k. Specify                                                                                                                     | b2k_other_spe        |                   |                                        |
| Section: B3 | b3. If water related - Household and Village/town | a. Household/Village Not getting drinkable water (bad smell, dirty etc)                                                        | b3a_no_drinking      | Yes - 1<br>No - 0 | Clean water and sanitation             |
|             |                                                   | b. Household/Village Not have water connection in the household or facing problem in getting water connection (Nal Jal scheme) | b3b_water_connection | Yes - 1<br>No - 0 | Clean water and sanitation             |
|             |                                                   | c. Household/Village Water bill related issues such getting huge water bill                                                    | b3c_water_bill       | Yes - 1<br>No - 0 | Clean water and sanitation             |
|             |                                                   | d. Household/Village Not have enough water facilities (pubic handpump, tap)                                                    | b3d_water_point      | Yes - 1<br>No - 0 | Clean water and sanitation             |

|             |                            |                                                                                                    |                         |                   |                                        |
|-------------|----------------------------|----------------------------------------------------------------------------------------------------|-------------------------|-------------------|----------------------------------------|
|             |                            | e. Household/Village Not getting enough water/water supply                                         | b3e_water_supply        | Yes - 1<br>No - 0 | Clean water and sanitation             |
|             |                            | f. Household/village Not following COVID19 rule/guideline at water point                           | b3f_covid_rule          | Yes - 1<br>No - 0 | Peace, Justice and strong institutions |
|             |                            | g. Other                                                                                           | b3g_other               | Yes - 1<br>No - 0 |                                        |
|             |                            | h. Specify                                                                                         | b3h_other_spe           |                   |                                        |
| Section: B4 | b4. If electricity related | a. Power outage                                                                                    | b4a_elec_outrage        | Yes - 1<br>No - 0 | Sustainable cities and communities     |
|             |                            | b. Tranformar not working                                                                          | b4b_tranformer          | Yes - 1<br>No - 0 | Sustainable cities and communities     |
|             |                            | c. getting electricity only for few hours                                                          | b4c_less_elect          | Yes - 1<br>No - 0 | Sustainable cities and communities     |
|             |                            | d. Not following any other COVID19 rule/guideline at electricity office                            | b4d_covid_rule          | Yes - 1<br>No - 0 | Peace, Justice and strong institutions |
|             |                            | e. Other                                                                                           | b4e_other               | Yes - 1<br>No - 0 |                                        |
|             |                            | f. Specify                                                                                         | b4f_other_spe           |                   |                                        |
| Section: B5 | b5. If transport related   | a. Want to go home but no transportation facility available                                        | b5a_no_transport        | Yes - 1<br>No - 0 | Sustainable cities and communities     |
|             |                            | b.No permission from Govt to go home during lockdown, police harassment, trucks stopped at borders | b5b_tranport_permission | Yes - 1<br>No - 0 | Peace, Justice and strong institutions |
|             |                            | c. Train tickets are not available, problems with registration                                     | b5c_no_ticket           | Yes - 1<br>No - 0 | Sustainable cities and communities     |
|             |                            | d. Not following COVID19 rule/guideline at bus/train station                                       | b5d_covid_rule          | Yes - 1<br>No - 0 | Peace, Justice and strong institutions |
|             |                            | e. On the way, or reached home, problems faced in the process                                      | b5e_reaching_home       | Yes - 1<br>No - 0 | Sustainable cities and communities     |
|             |                            | f. Other                                                                                           | b5f_other               | Yes - 1<br>No - 0 |                                        |
|             |                            | g. Specify                                                                                         | b5g_other_spe           |                   |                                        |
| Section:B6  | b6. If Gas related         | a. Not getting cylinder                                                                            | b6a_no_cylinder         | Yes - 1<br>No - 0 | No poverty                             |
|             |                            | b. Gas agency taking more money                                                                    | b6b_more_money          | Yes - 1<br>No - 0 | Peace, Justice and strong institutions |
|             |                            | c. Not getting benefit of Ujjawala Yojna                                                           | b6c_ujjawala_scheme     | Yes - 1<br>No - 0 | No poverty                             |
|             |                            | d. Not following any other COVID19 rule/guideline at gas agency                                    | b6d_covid_rule          | Yes - 1<br>No - 0 | Peace, Justice and strong institutions |
|             |                            | e. Other                                                                                           | b6e_other               | Yes - 1<br>No - 0 |                                        |
|             |                            | f. Specify                                                                                         | b6f_other_spe           |                   |                                        |



|                                         |                       |                                                                     |                            |                                        |                                        |
|-----------------------------------------|-----------------------|---------------------------------------------------------------------|----------------------------|----------------------------------------|----------------------------------------|
| Section: B7                             | b7. If health related | a. Not getting respons from emergency health number/ No not working | b7a_emergency_n<br>o       | Yes - 1<br>No - 0                      | Good health and well-being             |
|                                         |                       | b. Health facility is not open                                      | b7b_closed_facility        | Yes - 1<br>No - 0                      | Good health and well-being             |
|                                         |                       | c. Health staff is not providing survices                           | b7c_not_working            | Yes - 1<br>No - 0                      | Good health and well-being             |
|                                         |                       | d. Health staff absence                                             | b7d_absent_staff           | Yes - 1<br>No - 0                      | Good health and well-being             |
|                                         |                       | e. Health equipment not working or not available                    | b7e_equipment              | Yes - 1<br>No - 0                      | Good health and well-being             |
|                                         |                       | f. Health staff bad behaviour                                       | b7f_bad_behave             | Yes - 1<br>No - 0                      | Good health and well-being             |
|                                         |                       | g. Asking for money /bribe                                          | b7g_bribe                  | Yes - 1<br>No - 0                      | Good health and well-being             |
|                                         |                       | h. Abulance is not coming                                           | b7h_ambulance              | Yes - 1<br>No - 0                      | Good health and well-being             |
|                                         |                       | i. No health insurance for health staff                             | b7i_staff_insuranc<br>e    | Yes - 1<br>No - 0                      | Good health and well-being             |
|                                         |                       | j. Not getting medicine                                             | b7j_medecine               | Yes - 1<br>No - 0                      | Good health and well-being             |
|                                         |                       | k. VHND/vaccination days is not organizing                          | b7k_no_vhnd                | Yes - 1<br>No - 0                      | Good health and well-being             |
|                                         |                       | l. Not following COVID19 rule/guideline at hospital/facility        | b7l_covid_rule             | Yes - 1<br>No - 0                      | Peace, Justice and strong institutions |
|                                         |                       | m. Health staff not following COVID19 guideline/rule                | b7m_staff_covid_r<br>ule   | Yes - 1<br>No - 0                      | Peace, Justice and strong institutions |
|                                         |                       | n. PPE kit not available the the health facility for the staff      | b7n_no_ppe                 | Yes - 1<br>No - 0                      | Good health and well-being             |
|                                         |                       | o. No water facility available at the health facility               | b7o_no_water               | Yes - 1<br>No - 0                      | Clean water and sanitation             |
|                                         |                       | p. Health facility Water is not drinkable (bad smell, dirty etc)    | b7p_drinking_wate<br>r     | Yes - 1<br>No - 0                      | Clean water and sanitation             |
|                                         |                       | q. Health facility Water supply problem                             | b7q_water_supply           | Yes - 1<br>No - 0                      | Clean water and sanitation             |
|                                         |                       | r. Aanganwadi is closed                                             | b7r_awc_closed             | Yes - 1<br>No - 0                      | Good health and well-being             |
|                                         |                       | s. Children not getting food in the AWC or ration delivered at home | b7s_awwchild_rati<br>on    | Yes - 1<br>No - 0                      | Good health and well-being             |
|                                         |                       | t. Aangawadi staff absent                                           | b7t_aww_absent             | Yes - 1<br>No - 0                      | Good health and well-being             |
| u. Aangawadi staff not doing their work | b7u_aww_no_wor<br>k   | Yes - 1<br>No - 0                                                   | Good health and well-being |                                        |                                        |
| v. Other                                | b7v_other             | Yes - 1<br>No - 0                                                   |                            |                                        |                                        |
| w. Specify                              | b7w_other_spe         |                                                                     |                            |                                        |                                        |
| Section: B8                             | a. Person absconded   | b8a_absconded                                                       | Yes - 1<br>No - 0          | Peace, Justice and strong institutions |                                        |

|                  |                                            |                                                                                         |                            |                   |                                        |
|------------------|--------------------------------------------|-----------------------------------------------------------------------------------------|----------------------------|-------------------|----------------------------------------|
|                  | b8. If quarantine related                  | b.No quarantine facility available for migrant who coming from other places             | b8b_no_quarantine_facility | Yes - 1<br>No - 0 | Peace, Justice and strong institutions |
|                  |                                            | c. In quarantine centre people not staying at quarantine centre                         | b8c_no_stay_quarantine     | Yes - 1<br>No - 0 | Peace, Justice and strong institutions |
|                  |                                            | d. No authority personnel coming to monitor the centre                                  | b8d_no_monitoring          | Yes - 1<br>No - 0 | Peace, Justice and strong institutions |
|                  |                                            | e. No food facility available at the centre                                             | b8e_no_food                | Yes - 1<br>No - 0 | Peace, Justice and strong institutions |
|                  |                                            | f. No sanitation facility available at the centre                                       | b8f_no_sanitation          | Yes - 1<br>No - 0 | Clean water and sanitation             |
|                  |                                            | g. No water facility available at the centre                                            | b8g_no_water               | Yes - 1<br>No - 0 | Clean water and sanitation             |
|                  |                                            | h. Not following any other COVID19 rule/guideline at quarantine centre                  | b8h_covid_rule             | Yes - 1<br>No - 0 | Peace, Justice and strong institutions |
|                  |                                            | i. Village head not supporting                                                          | b8i_no_support             | Yes - 1<br>No - 0 | Peace, Justice and strong institutions |
|                  |                                            | j. People Oposing quarantine center                                                     | b8j_oppose_people          | Yes - 1<br>No - 0 | Peace, Justice and strong institutions |
|                  |                                            | k. No electricity at quarantine centre2                                                 | b8k_no_electricity         | Yes - 1<br>No - 0 | Sustainable cities and communities     |
|                  |                                            | l. Other                                                                                | b8l_other                  | Yes - 1<br>No - 0 |                                        |
|                  |                                            | m. Specify                                                                              | b8m_other_specify          |                   |                                        |
| Section: B9 & 10 | b910. If employment/ work, including NREGA | a. Not getting any work                                                                 | b910a_no_work              | Yes - 1<br>No - 0 | Decent work and economic growth        |
|                  |                                            | b. Company/Employer/Government not giving salary / fund                                 | b910b_no_salary            | Yes - 1<br>No - 0 | Decent work and economic growth        |
|                  |                                            | c. Employer not allowing to go home                                                     | b910c_force_stay           | Yes - 1<br>No - 0 | Decent work and economic growth        |
|                  |                                            | d. Employer forcing to work                                                             | b910d_force_work           | Yes - 1<br>No - 0 | Decent work and economic growth        |
|                  |                                            | e. At workplace work conditions are not good , eg. social distancing not being followed | b910e_work_condition       | Yes - 1<br>No - 0 | Decent work and economic growth        |
|                  |                                            | f. Force to work long hours                                                             | b910f_long_workhour        | Yes - 1<br>No - 0 | Decent work and economic growth        |
|                  |                                            | g. Children are working (less than 14 years)                                            | b910g_child_labour         | Yes - 1<br>No - 0 | Decent work and economic growth        |
|                  |                                            | h. Not following any other COVID19 rule/guideline at work place                         | b910h_covid_rule           | Yes - 1<br>No - 0 | Peace, Justice and strong institutions |
|                  |                                            | i. Other                                                                                | b910i_other                | Yes - 1<br>No - 0 |                                        |
|                  |                                            | j. Specify                                                                              | b910j_other_specify        |                   |                                        |
| Section: B11     | b11. If Education                          | a. School is closed                                                                     | b11a_school_closed         | Yes - 1<br>No - 0 | Quality education                      |
|                  |                                            | b.Children not getting mid-day meal in school                                           | b11b_no_mdm                | Yes - 1<br>No - 0 | Zero hunger                            |

|               |                                           |                                                                |                           |                   |                                        |
|---------------|-------------------------------------------|----------------------------------------------------------------|---------------------------|-------------------|----------------------------------------|
|               | (School) related                          | or ration delivered at home                                    |                           |                   |                                        |
|               |                                           | c. School teacher absent                                       | b11c_teacher_absent       | Yes - 1<br>No - 0 | Quality education                      |
|               |                                           | d. School staff not doing their work                           | b11d_staff_notworking     | Yes - 1<br>No - 0 | Quality education                      |
|               |                                           | e. Other                                                       | b11e_other                | Yes - 1<br>No - 0 |                                        |
|               |                                           | f. Specify                                                     | b11f_other_spe            |                   |                                        |
| Section: B12  | b12. If higher education related          | a. Not able to find a job                                      | b12a_no_work              | Yes - 1<br>No - 0 | Decent work and economic growth        |
|               |                                           | b. Career opportunities unclear                                | b12b_unclear_career       | Yes - 1<br>No - 0 | Peace, Justice and strong institutions |
|               |                                           | c. Unable to pursue education further                          | b12c_further_study        | Yes - 1<br>No - 0 | Quality education                      |
|               |                                           | d. Stipend issues (Delay/ no stipend)                          | b12d_stipend              | Yes - 1<br>No - 0 | Peace, Justice and strong institutions |
| Section: B13  | b13. Not following COVID19 rule/guideline | a. Not following social distancing                             | b13a_social_distancing    | Yes - 1<br>No - 0 | Peace, Justice and strong institutions |
|               |                                           | b. Not washing hands                                           | b13b_handwash             | Yes - 1<br>No - 0 | Peace, Justice and strong institutions |
|               |                                           | c. Not using gloves                                            | b13c_gloves               | Yes - 1<br>No - 0 | Peace, Justice and strong institutions |
|               |                                           | d. Not wearing mask                                            | b13d_facemask             | Yes - 1<br>No - 0 | Peace, Justice and strong institutions |
|               |                                           | e. Other                                                       | b13e_other                | Yes - 1<br>No - 0 |                                        |
|               |                                           | f. Specify                                                     | b13f_other_spe            |                   |                                        |
| Section: B14  | b14. If discrimination                    | a. Gender discrimination                                       | b14a_gender               | Yes - 1<br>No - 0 | Reduce inequalities                    |
|               |                                           | b. Caste discrimination                                        | b14b_caste                | Yes - 1<br>No - 0 | Reduce inequalities                    |
|               |                                           | c. Religious discrimination                                    | b14c_religious            | Yes - 1<br>No - 0 | Reduce inequalities                    |
|               |                                           | d. Discrimination with COVID patient's family                  | b14d_covid_patient_family | Yes - 1<br>No - 0 | Peace, Justice and strong institutions |
|               |                                           | e. Discrimination with people returning from other places      | b14e_migrant              | Yes - 1<br>No - 0 | Reduce inequalities                    |
|               |                                           | f. Discrimination with COVID patient                           | b14f_covid_patient        | Yes - 1<br>No - 0 | Reduce inequalities                    |
|               |                                           | g. Other                                                       | b14g_other                | Yes - 1<br>No - 0 |                                        |
|               |                                           | h. Specify                                                     | b14h_other_spe            |                   |                                        |
| Section: B15  | b15. If violence related                  | a. Domestic violence (against women or children)               | b15a_domestic             | Yes - 1<br>No - 0 | Peace, Justice and strong institutions |
|               |                                           | b. Communal violence                                           | b15b_communal             | Yes - 1<br>No - 0 | Peace, Justice and strong institutions |
|               |                                           | c. Other                                                       | b15c_other                | Yes - 1<br>No - 0 |                                        |
|               |                                           | d. specify                                                     | b15d_other_spe            |                   |                                        |
| Section : B16 | b16. Farming related                      | a. Water for irrigation (Pradhan Mantri Krishi Sinchai Yojana) | b16a_irrigation           | Yes - 1<br>No - 0 | Peace, Justice and strong institutions |

|                                                                                   |                                                        |                                                                               |                                                                     |                   |                                        |
|-----------------------------------------------------------------------------------|--------------------------------------------------------|-------------------------------------------------------------------------------|---------------------------------------------------------------------|-------------------|----------------------------------------|
|                                                                                   | issues, for land-holding farmers, for landless farmers | b. Electricity problemm                                                       | b16b_electricity                                                    | Yes - 1<br>No - 0 | Peace, Justice and strong institutions |
|                                                                                   |                                                        | c. Diesel problem for tracktor or tubewell                                    | b16c_fuel                                                           | Yes - 1<br>No - 0 | Peace, Justice and strong institutions |
|                                                                                   |                                                        | d. Transportation problem in marketing the product or carrying from the field | b16d_transport                                                      | Yes - 1<br>No - 0 | Peace, Justice and strong institutions |
|                                                                                   |                                                        | e.Payment issues (delay/no payment)                                           | b16e_payment                                                        | Yes - 1<br>No - 0 | No poverty                             |
|                                                                                   |                                                        | f. Less produce                                                               | b16f_less_produce                                                   | Yes - 1<br>No - 0 | No poverty                             |
|                                                                                   |                                                        | g. Not have money to repay the loan                                           | b16g_loan_repay ment                                                | Yes - 1<br>No - 0 | No poverty                             |
|                                                                                   |                                                        | h.not have money/ produce to repay the landlord (landless farmers)            | b16h_land_repay ment                                                | Yes - 1<br>No - 0 | No poverty                             |
|                                                                                   |                                                        | i.Not getting good prices of produce                                          | b16i_market_prices                                                  | Yes - 1<br>No - 0 | Peace, Justice and strong institutions |
|                                                                                   |                                                        | j. Fertilizer related issues                                                  | b16j_fertilizer                                                     | Yes - 1<br>No - 0 | Peace, Justice and strong institutions |
|                                                                                   |                                                        | Section: B17                                                                  | b17. Other livelihood issues - street vendors, shopkeepers, traders | a. Less income    | b17a_less_income                       |
| b. Not getting pass to open shop/ to work / Not allowed to resume the work        | b17b_work_permis sion                                  |                                                                               |                                                                     | Yes - 1<br>No - 0 | Peace, Justice and strong institutions |
| c. Authorities are misbehaving (Police)                                           | b17c_police_misb ehave                                 |                                                                               |                                                                     | Yes - 1<br>No - 0 | Peace, Justice and strong institutions |
| d. Authorities are asking for a bribe to open shop/ to do regular business        | b17d_bribe                                             |                                                                               |                                                                     | Yes - 1<br>No - 0 | Peace, Justice and strong institutions |
| e.Goods supply issues (Not getting supply of goods, insufficient supply of goods) | b17e_goods_suppl y                                     |                                                                               |                                                                     | Yes - 1<br>No - 0 | Peace, Justice and strong institutions |
| f. Transportation related issues                                                  | b17f_tranport                                          |                                                                               |                                                                     | Yes - 1<br>No - 0 | Peace, Justice and strong institutions |
| g.Payment issues (delay/no payment)                                               | b17g_payment                                           |                                                                               |                                                                     | Yes - 1<br>No - 0 | No poverty                             |
| h.Not have money to repay loan                                                    | b17h_loan_repay                                        |                                                                               |                                                                     | Yes - 1<br>No - 0 | No poverty                             |
| Section: C                                                                        | c. Audio Type                                          |                                                                               |                                                                     | Audio type        | c_audio_type                           |

Supplementary table 2. Construction of the SDG variables

| SDG Target                                                                                                                                                                                                                                                                                                                                                                                                                                                                                                                                                                                                                                                                                                                                                              | The Right to Health: entitlements & determinants                                                                                                                                                                                                                                                                                                                                                                                                                                                                                       | Field from coding template <sup>1</sup>                                                                                                                                   |
|-------------------------------------------------------------------------------------------------------------------------------------------------------------------------------------------------------------------------------------------------------------------------------------------------------------------------------------------------------------------------------------------------------------------------------------------------------------------------------------------------------------------------------------------------------------------------------------------------------------------------------------------------------------------------------------------------------------------------------------------------------------------------|----------------------------------------------------------------------------------------------------------------------------------------------------------------------------------------------------------------------------------------------------------------------------------------------------------------------------------------------------------------------------------------------------------------------------------------------------------------------------------------------------------------------------------------|---------------------------------------------------------------------------------------------------------------------------------------------------------------------------|
| <p><b>1.No poverty</b><br/>End poverty in all its forms everywhere</p> <p>1.5. By 2030, build the resilience of the poor and those in vulnerable situations and reduce their exposure and vulnerability to climate-related extreme events and other economic, social and environmental shocks and disasters</p> <p>1.3. Implement nationally appropriate social protection systems and measures for all, including floors, and by 2030 achieve substantial coverage of the poor and the vulnerable</p> <p>1.3.1. Proportion of population covered by social protection floors/systems, by sex, distinguishing children, unemployed persons, older persons, persons with disabilities, pregnant women, newborns, work-injury victims and the poor and the vulnerable</p> | <p>Social security<br/>Income</p>                                                                                                                                                                                                                                                                                                                                                                                                                                                                                                      | <ul style="list-style-type: none"> <li>· Financial</li> <li>· Livelihoods</li> <li>· Farming, agriculture or livestock</li> </ul>                                         |
| <p><b>2. Zero hunger</b><br/>End hunger, achieve food security and improved nutrition and promote sustainable agriculture</p> <p>2.1. By 2030, end hunger and ensure access by all people, in particular the poor and people in vulnerable situations, including infants, to safe, nutritious and sufficient food all year round</p>                                                                                                                                                                                                                                                                                                                                                                                                                                    | <p>Safe food; adequate nutrition<sup>1</sup></p>                                                                                                                                                                                                                                                                                                                                                                                                                                                                                       | <ul style="list-style-type: none"> <li>· Food</li> <li>· Food entitlements<sup>2</sup></li> </ul>                                                                         |
| <p><b>3. Good health and well-being</b><br/>Ensure healthy lives and promote well-being for all at all ages</p> <p>3.8. Achieve universal health coverage, including financial risk protection, access to quality essential health-care services and access to safe, effective, quality and affordable essential medicines and vaccines for all</p> <p>3.D Strengthen the capacity of all countries, in particular developing countries, for early warning, risk reduction and management of national and global health risks</p> <p>International Health Regulations (IHR) capacity and health emergency preparedness</p>                                                                                                                                              | <p>Entitlements conferred by the right to health:<sup>1</sup></p> <ul style="list-style-type: none"> <li>· Equal and timely access to basic health services</li> <li>· The right to prevention, treatment and control of diseases;</li> <li>· Access to essential medicines and vaccines;</li> </ul> <p>Protection against the financial effects of ill health:<sup>2</sup></p> <ul style="list-style-type: none"> <li>· Level of financial health protection</li> <li>· Inequities in level of financial health protection</li> </ul> | <ul style="list-style-type: none"> <li>· Health</li> <li>· Quarantine</li> <li>· COVID19 rule/guideline</li> <li>· COVID19 lack of awareness or misinformation</li> </ul> |

|                                                                                                                                                                                                                                                                                                                                                                                                                                                                                                                                                                                                                                                   |                                                                              |                                                                                                                                          |
|---------------------------------------------------------------------------------------------------------------------------------------------------------------------------------------------------------------------------------------------------------------------------------------------------------------------------------------------------------------------------------------------------------------------------------------------------------------------------------------------------------------------------------------------------------------------------------------------------------------------------------------------------|------------------------------------------------------------------------------|------------------------------------------------------------------------------------------------------------------------------------------|
| <p><b>4. Quality education</b><br/>Ensure inclusive and equitable quality education and promote lifelong learning opportunities for all</p> <p>4.1. By 2030, ensure that all girls and boys complete free, equitable and quality primary and secondary education leading to relevant and effective learning outcomes</p> <p>4.2. By 2030, ensure that all girls and boys have access to quality early childhood development, care and pre-primary education so that they are ready for primary education</p> <p>4.6. By 2030, ensure that all youth and a substantial proportion of adults, both men and women, achieve literacy and numeracy</p> | <p>Education</p> <p>Health related education and information<sup>1</sup></p> | <ul style="list-style-type: none"> <li>· Education (Anganwadi/ pre-school &amp; school)</li> </ul>                                       |
| <p><b>5. Gender equality</b><br/>Achieve gender equality and empower all women and girls</p> <p>5.1. End all forms of discrimination against all women and girls everywhere</p> <p>5.2. Eliminate all forms of violence against all women and girls in the public and private spheres, including trafficking and sexual and other types of exploitation</p>                                                                                                                                                                                                                                                                                       | <p>Gender<br/>(<i>priority group : women</i>)</p>                            | <ul style="list-style-type: none"> <li>· Sexual harassment</li> </ul>                                                                    |
| <p><b>6. Clean water and sanitation</b><br/>Ensure availability and sustainable management of water and sanitation for all</p> <p>6.4. By 2030, substantially increase water-use efficiency across all sectors and ensure sustainable withdrawals and supply of freshwater to address water scarcity and substantially reduce the number of people suffering from water scarcity</p>                                                                                                                                                                                                                                                              | <p>Safe drinking water &amp; adequate sanitation<sup>1</sup></p>             | <ul style="list-style-type: none"> <li>· Water</li> <li>· Sanitation</li> </ul>                                                          |
| <p><b>8. Decent work and economic growth</b><br/>Promote sustained, inclusive and sustainable economic growth, full and productive employment and decent work for all</p> <p>8.8. Protect labour rights and promote safe and secure working environments for all workers, including migrant workers, in particular women migrants, and those in precarious employment</p>                                                                                                                                                                                                                                                                         | <p>Healthy working conditions<sup>1</sup></p>                                | <ul style="list-style-type: none"> <li>· Employment/ work NREGA<sup>3</sup></li> <li>· Employment/ work non-NREGA<sup>3</sup></li> </ul> |

|                                                                                                                                                                                                                                                                                                                                                                                                                                                                                                                             |                                                                                                                                                                                                                                                 |                                                                                                                                                                                                                                                                                                                                                         |
|-----------------------------------------------------------------------------------------------------------------------------------------------------------------------------------------------------------------------------------------------------------------------------------------------------------------------------------------------------------------------------------------------------------------------------------------------------------------------------------------------------------------------------|-------------------------------------------------------------------------------------------------------------------------------------------------------------------------------------------------------------------------------------------------|---------------------------------------------------------------------------------------------------------------------------------------------------------------------------------------------------------------------------------------------------------------------------------------------------------------------------------------------------------|
| <p><b>10. Reduce inequalities</b><br/>Reduce inequality within and among countries</p> <p>10.2. By 2030, empower and promote the social, economic and political inclusion of all, irrespective of age, sex, disability, race, ethnicity, origin, religion or economic or other status</p>                                                                                                                                                                                                                                   | <p>Principle of non-discrimination<sup>1,3</sup></p> <p>Principle of equality of opportunity for everyone to enjoy the highest attainable level of health<sup>1</sup></p>                                                                       | <ul style="list-style-type: none"> <li>· Discrimination</li> </ul>                                                                                                                                                                                                                                                                                      |
| <p><b>11. Sustainable cities and communities</b><br/>Make cities and human settlements inclusive, safe, resilient and sustainable</p> <p>11.1. By 2030, ensure access for all to adequate, safe and affordable housing and basic services and upgrade slums</p>                                                                                                                                                                                                                                                             | <p>Decent housing</p> <p>Community participation in health<sup>1</sup></p>                                                                                                                                                                      | <ul style="list-style-type: none"> <li>· Electricity</li> <li>· Transport<sup>4</sup></li> <li>· Housing</li> <li>· Gas/Ujjawala Yojna</li> </ul>                                                                                                                                                                                                       |
| <p><b>16. Peace, Justice and strong institutions</b><br/>Promote peaceful and inclusive societies for sustainable development, provide access to justice for all and build effective, accountable and inclusive institutions at all levels</p> <p>16.5. Substantially reduce corruption and bribery in all their forms</p> <p>16.6. Develop effective, accountable and transparent institutions at all levels</p> <p>16.7. Ensure responsive, inclusive, participatory and representative decision-making at all levels</p> | <p>Inclusive policy or vulnerable populations targeted.<sup>2</sup></p> <ul style="list-style-type: none"> <li>· The extent to which governments produce policy that is tailored for vulnerable populations and populations in need.</li> </ul> | <ul style="list-style-type: none"> <li>· Black marketing and profiteering/ price rises</li> <li>· Local governance</li> <li>· Violence, domestic or communal</li> <li>· Relief measures not working<sup>5</sup></li> <li>· Financial services not working</li> <li>· Farming/livelihood related services not working</li> <li>· Other issues</li> </ul> |
| <p><b>Cross cutting principles: equality of opportunity to enjoy the highest attainable level of health; no one left behind</b></p>                                                                                                                                                                                                                                                                                                                                                                                         | <p>Discrimination, special populations<sup>1</sup></p>                                                                                                                                                                                          | <p>Priority populations:</p> <ul style="list-style-type: none"> <li>· Migrant workers</li> <li>· Disabled persons</li> </ul>                                                                                                                                                                                                                            |

<sup>1</sup> Caller contributions were coded into these high-level categories. The complete coding scheme is presented in Supplementary table 2.

<sup>2</sup> The Indian government provides various food entitlements, including the Public distribution system (PDS) scheme that provides subsidised food and non-food items to poor households, and mid-day meal programmes for children offered by Anganwadi (rural mother and child care and development) centres and schools.

<sup>3</sup> The Mahatma Gandhi National Rural Employment Guarantee Act 2005 aims to fulfil the right to work by providing at least 100 days of guaranteed minimum wage employment in a financial year to every rural household in exchange for unskilled manual labour on public works projects.

<sup>4</sup> Any transportation issue related to the COVID19 lockdown, including problems in accessing Government Shramik (labour) trains designed to carry migrant workers to their home states

<sup>5</sup> Problems in accessing various other social support measures provided by the Government of India, including pensions and gas subsidies.

## References

1. The Right to Health. Fact sheet no. 31: Office of the United Nations High Commissioner for Human Rights, World Health Organization, 2008.
2. Towards a global monitoring system for implementing the Rio Political Declaration on Social Determinants of Health: developing a core set of indicators for government action on the social determinants of health to improve health equity. *International Journal for Equity in Health* 2018; **17**(1).
3. Constitution of India. India: Government of India; 1950.



Supplementary figure 2. Temporal distribution of total calls and callers over the 100-day analysis period.

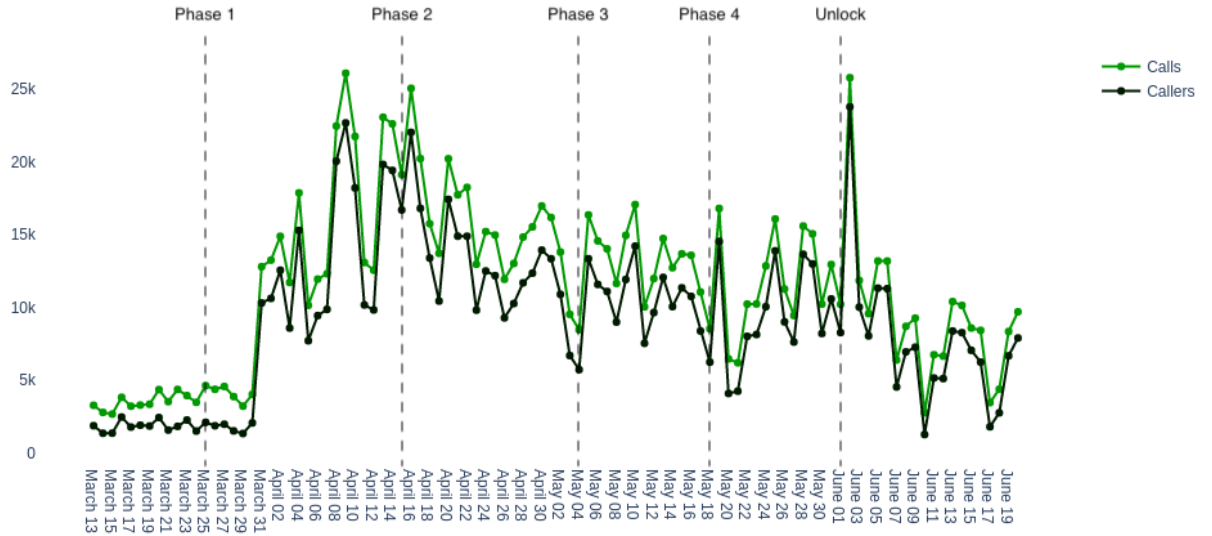

Supplementary figure 3. Temporal distribution of total contributions and SOS messages over the 100-day analysis period.

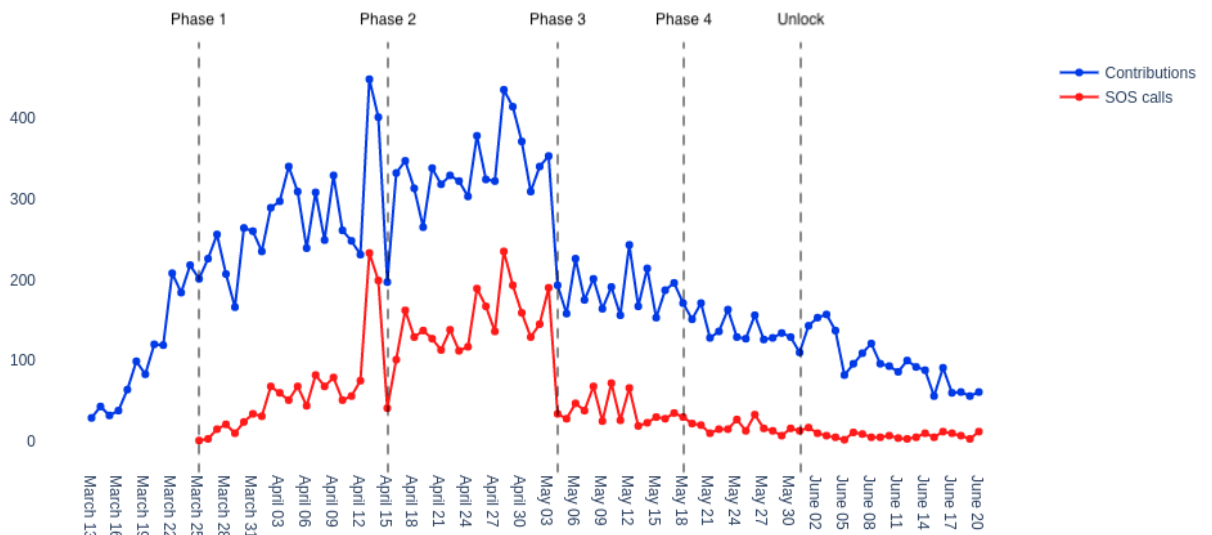

Supplementary figure 4. Temporal evolution of issues raised by rural callers<sup>1</sup> to the COVID-19 IVR platform March 13-June 20, 2020<sup>2</sup>

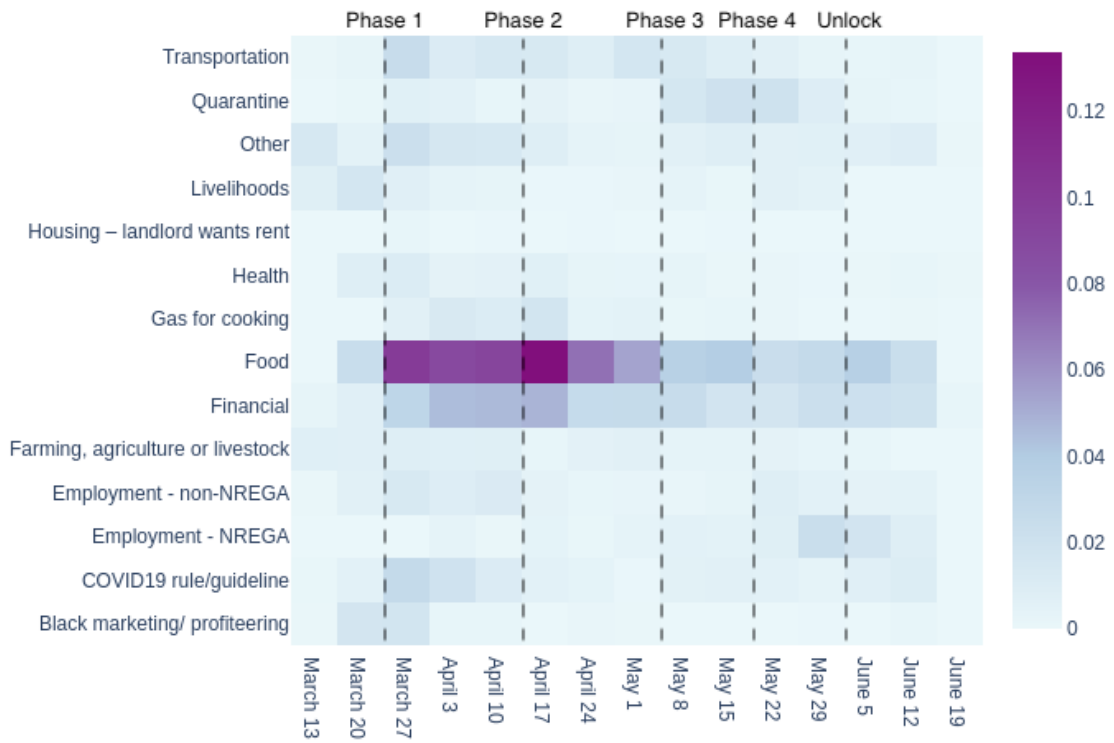

<sup>1</sup> Callers from rural areas of Bihar, Jharkhand, Madhya Pradesh and Uttar Pradesh

<sup>2</sup> To adjust for variations in call volumes, we present “normalised” user contributions as fractions of the total number of incoming calls per week.

Supplementary figure 5. Temporal evolution of issues raised by urban callers<sup>1</sup> to the COVID-19 IVR platform March 13-June 20, 2020<sup>2</sup>

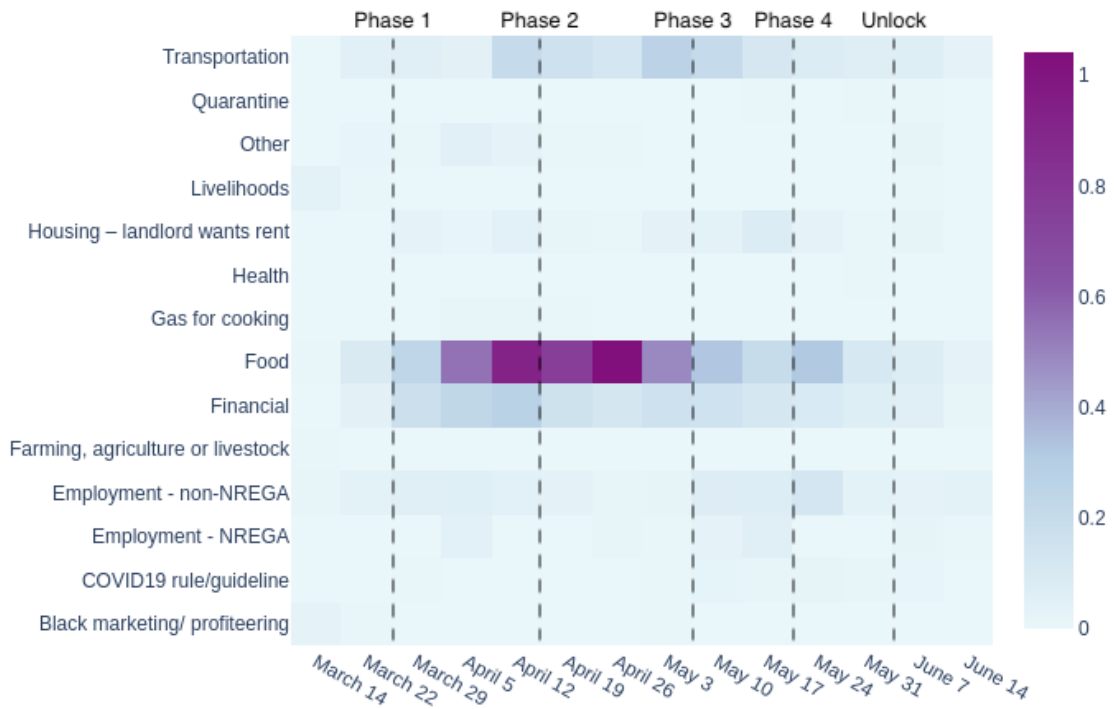

<sup>1</sup> Callers from urban centres (Delhi and the National Capital Region, Tamil Nadu)

<sup>2</sup> To adjust for variations in call volumes, we present “normalised” user contributions as fractions of the total number of incoming calls per week.

Supplementary figure 6. Issues raised by female callers<sup>1</sup> categorised according to the UN 2030 Sustainable Development Goals

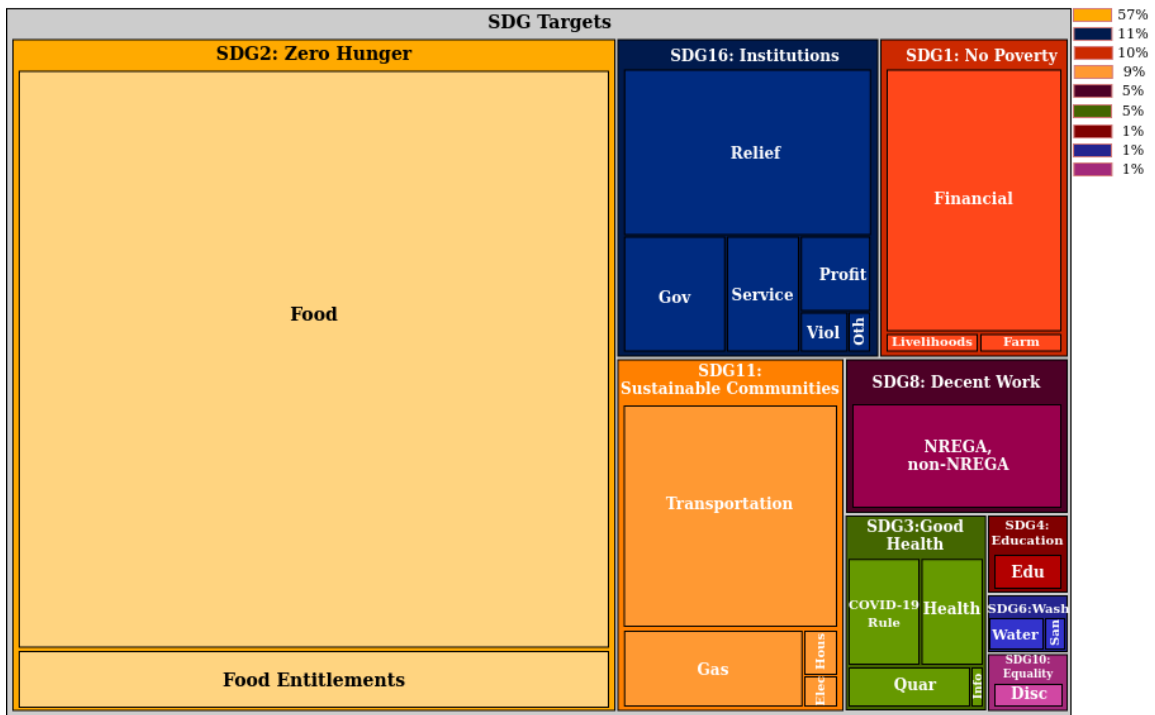

<sup>1</sup> Of the 6636 UGC contributions, 1322 contributions (representing 3554 issues related to the SDGs) were by females.

Supplementary figure 7. Issues raised by male callers<sup>1</sup> categorised according to the UN 2030 Sustainable Development Goals

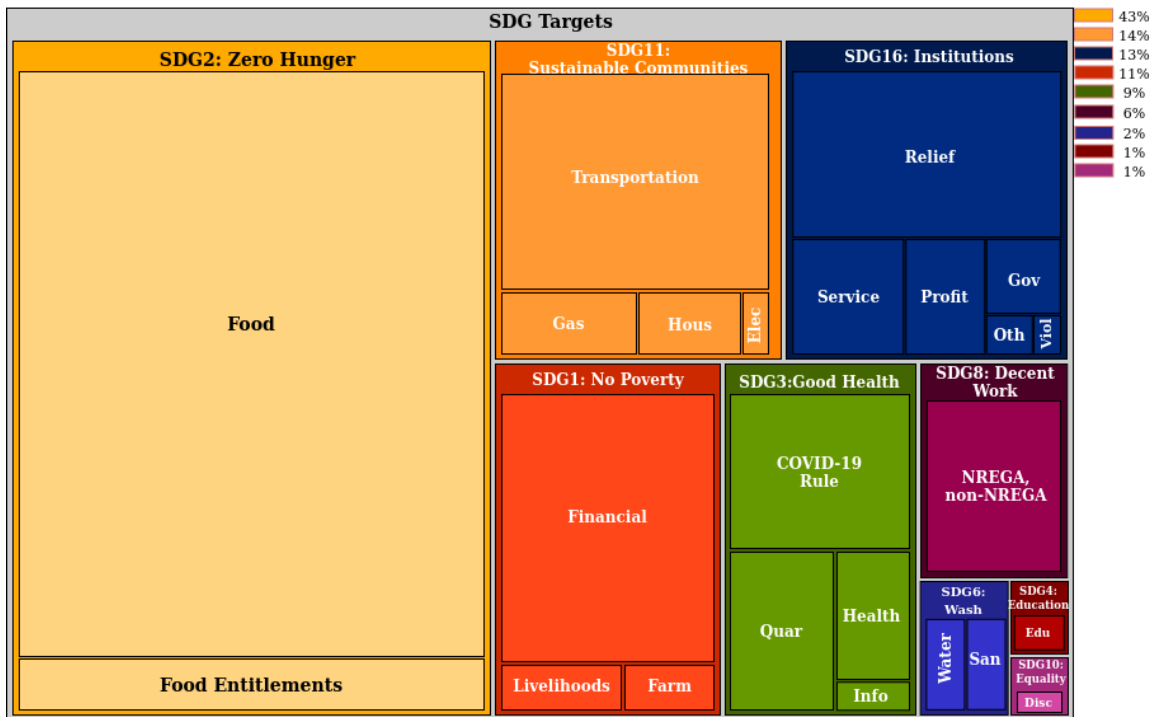

<sup>1</sup> Of the 6636 UGC contributions, 5312 contributions (representing 15,210 issues related to the SDGs) were by males.
